# Supplementary material for: Four North American glaciers advanced past their modern positions thousands of years apart in the Holocene
Source: Copernicus journal article supplement (doi:10.5194/tc-17-5459-2023), 2023-12-21
Supplement: Supplementary file 1 [file tc-17-5459-2023-supplement.zip]

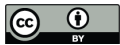

## *Supplement of*

# **Four North American glaciers advanced past their modern positions thousands of years apart in the Holocene**

**Andrew G. Jones et al.**

*Correspondence to:* Andrew G. Jones (agjones3@wisc.edu)

- tc-17-5459-2023-supplement-title-page.pdf
- Jones\_Supplement\_Revised\_Round2.pdf
- Table S1 14C and 10Be sample data.xlsx
- Table S2 10Be Laboratory Measurement details.xlsx
- Table S3 10Be blank data.xlsx
- Table S4 14C laboratory measurement details.xlsx
- Table S5. Glacier area calculations and details..xlsx

The copyright of individual parts of the supplement might differ from the article licence.
