# Supplementary material for: Four North American glaciers advanced past their modern positions thousands of years apart in the Holocene
Source: Copernicus journal article supplement (doi:10.5194/tc-17-5459-2023), 2023-12-21
Supplement: Supplementary file 2 [file tc-17-5459-2023-supplement.zip]

# Supplement to: “Four North American glaciers advanced past their modern positions thousands of years apart in the Holocene”

## Field photos and historical imagery

5

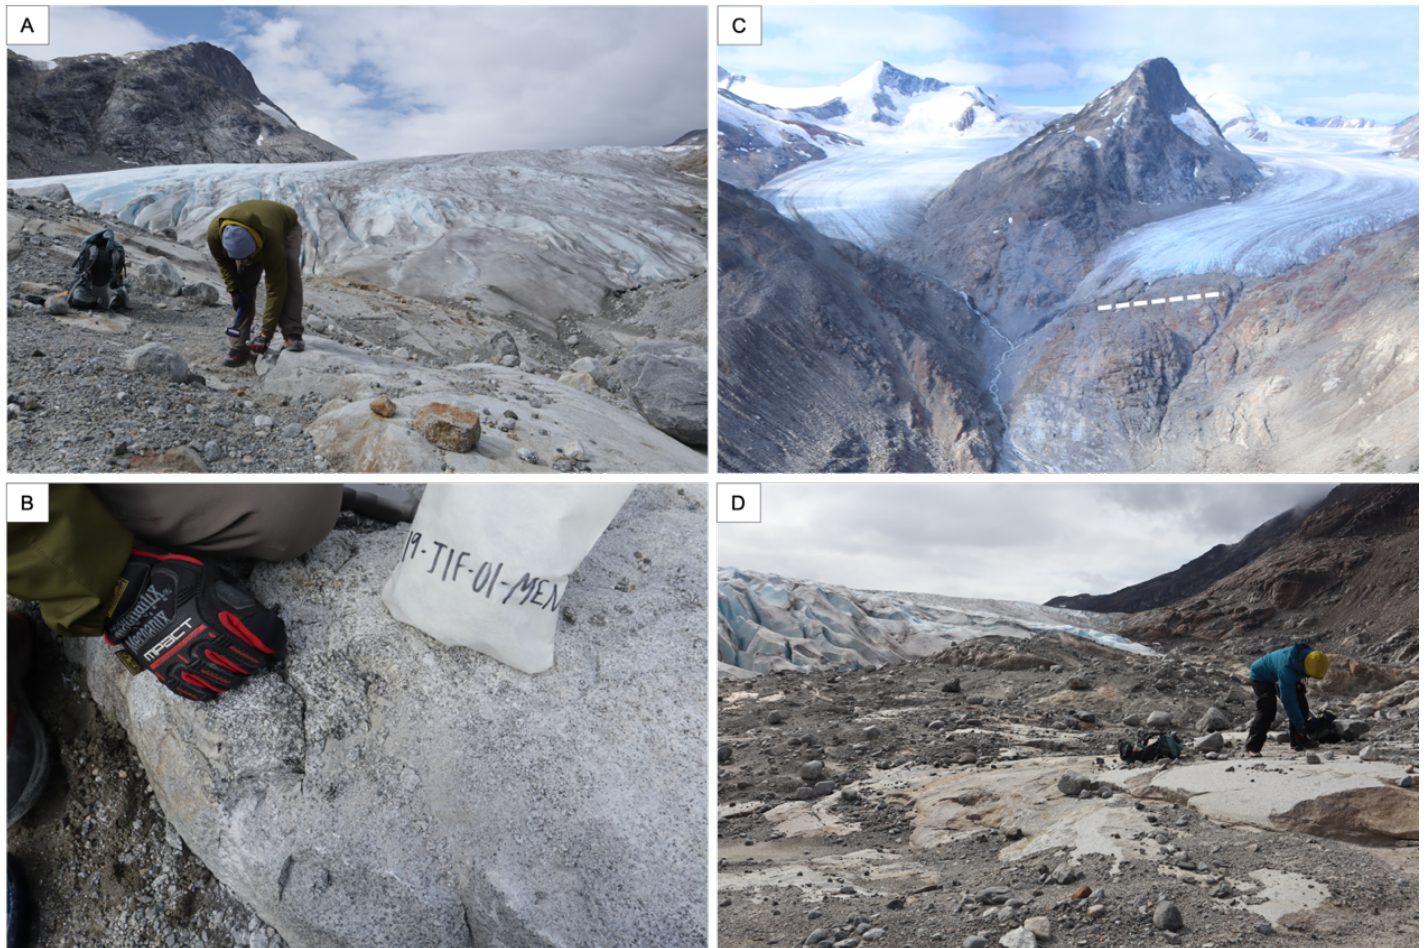

**Figure S1.** Juneau Ice Field Glacier field photos. **A, B.** Collection of sample JIF-01. **C.** Aerial view from helicopter. Approximate location of bedrock transect denoted with dashed line. **D.** Collection of sample JIF-08. Note glacially abraded bedrock and proximity to glacier. All photos from 2020 field work.

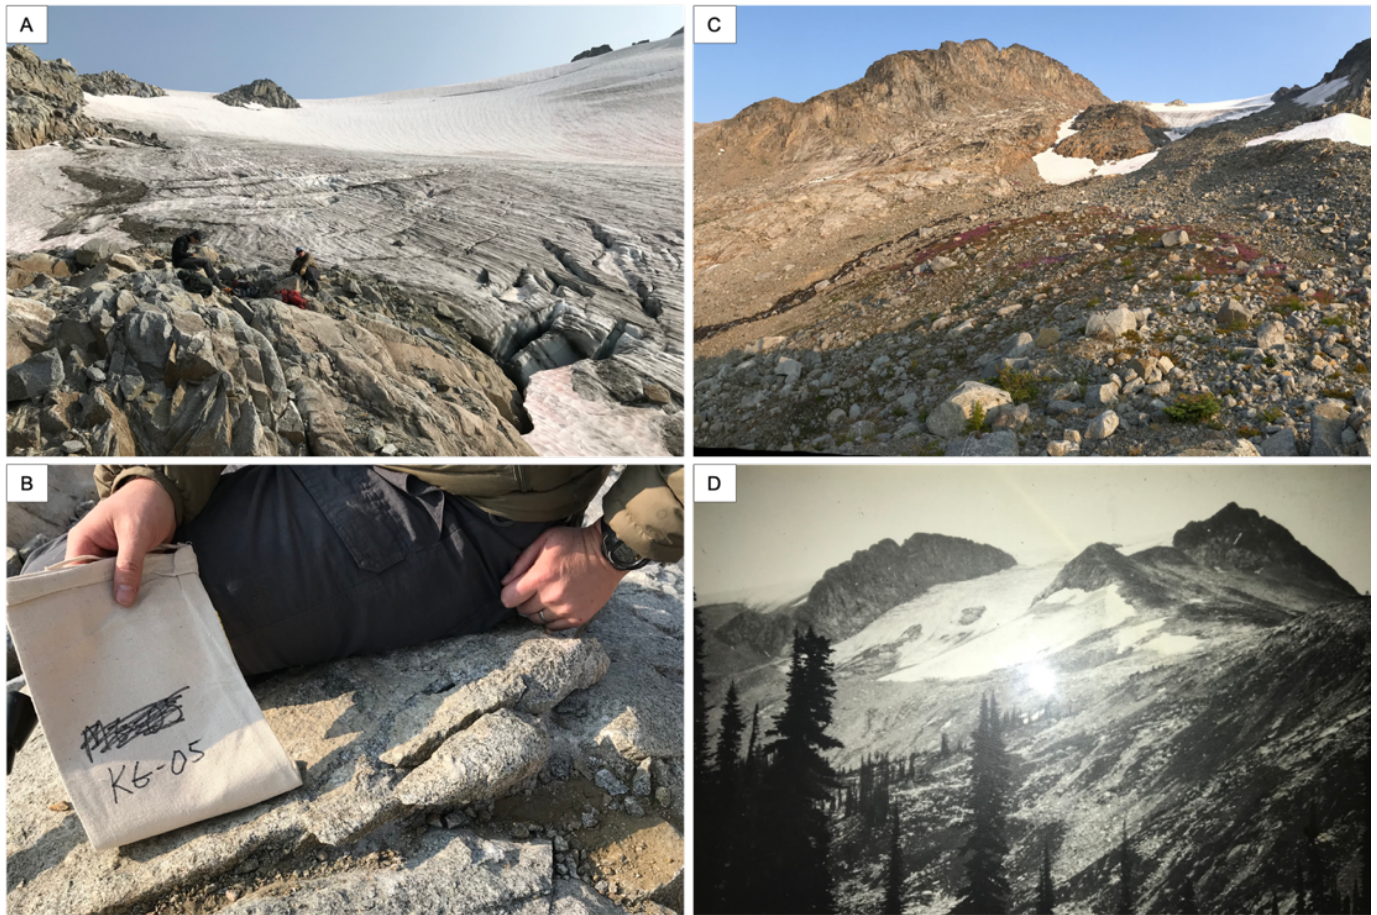

**Figure S2.** Kokanee Glacier field photos and historical photography. **A.** Collection of sample KG-06. Note abraded bedrock and proximity to glacier. **B.** Collection of sample KG-05. **C.** Glacial forefield. **D.** Historical photo from the Ross Fleming collection, taken between 1922-1926. Field photos (A, B, and C) taken during field work in 2018.

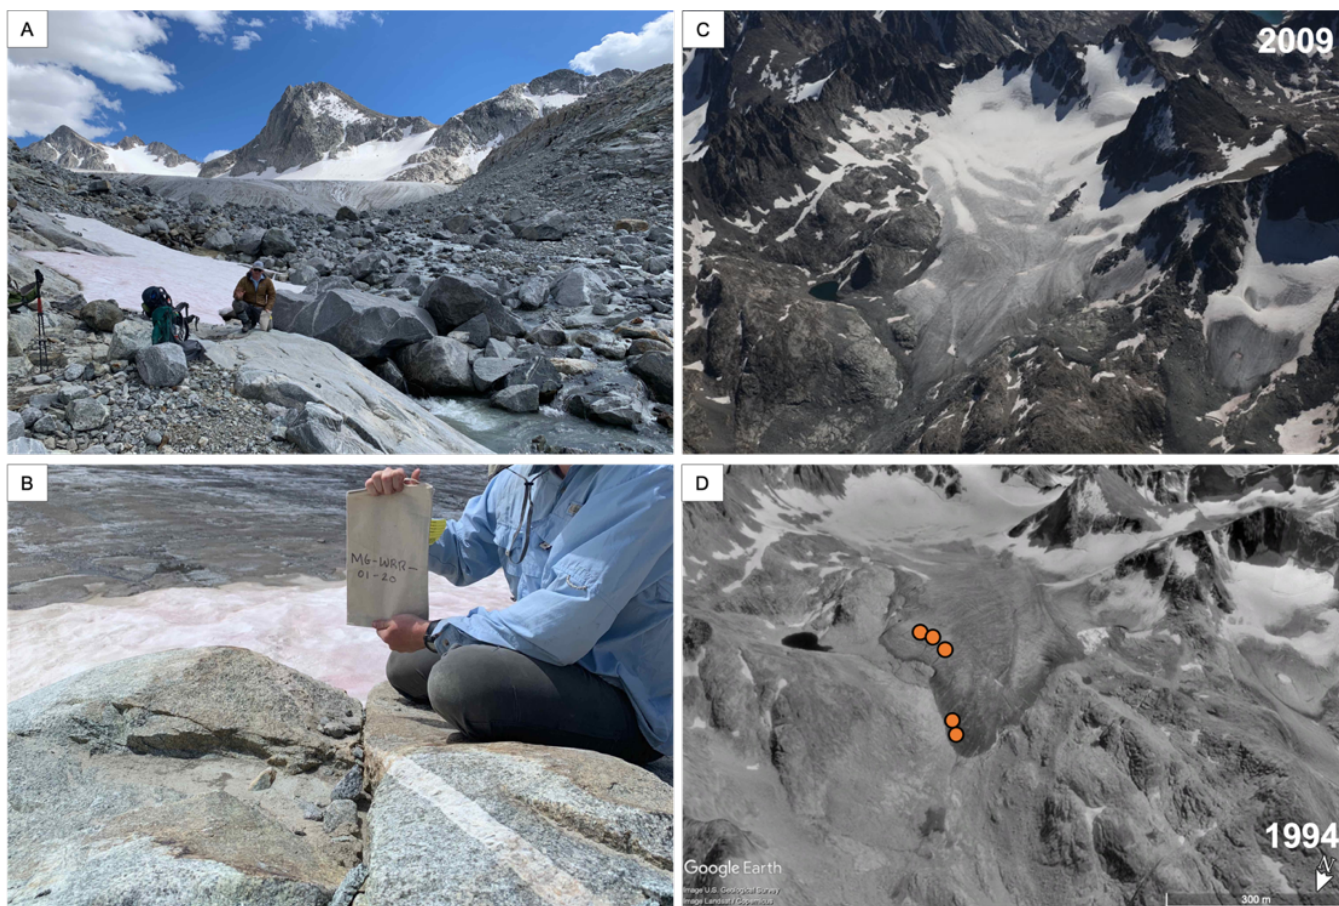

**Figure S3.** Mammoth Glacier field photos and historical photography. **A.** Collection of sample MG-05. This sample was furthest from the modern glacier of all samples in this study. **B.** Collection of MG-01. Note abraded bedrock and proximity to glacier. **C.** Aerial photography, 2009. Photo Credit: USGS. **D.** Oblique satellite image from 1994 showing all five samples buried under ice (Photo credit: Google Earth and USGS). Field photos (A, B) from field work in 2020.

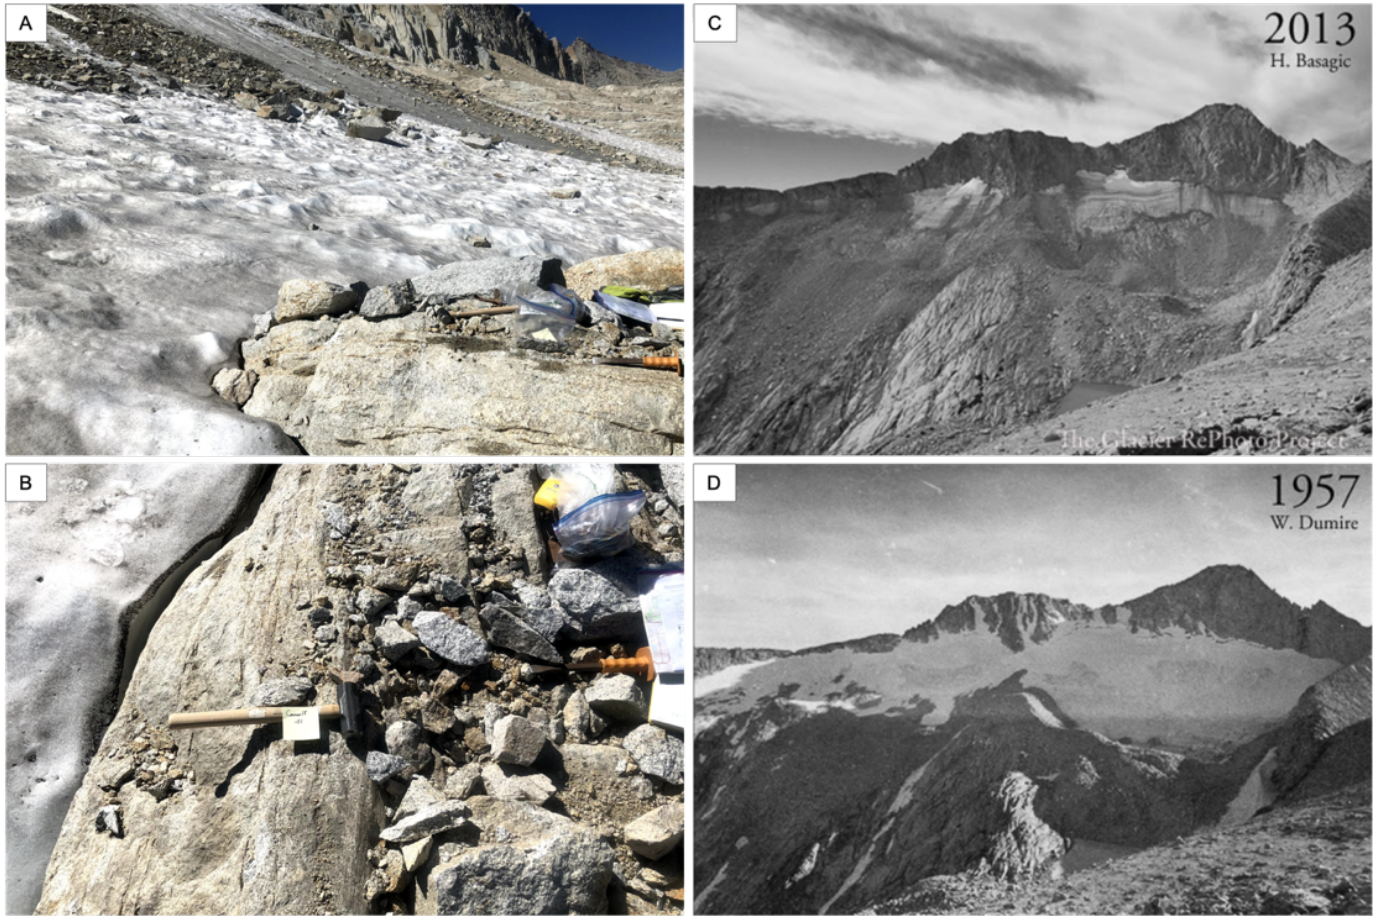

25

**Figure S4.** Conness Glacier field photos and repeat photography. **A, B.** Collection of sample CG-01. Photos from field work in 2018. Note abraded bedrock and proximity to glacier. **C, D.** Repeat photography from the Glacier RePhoto Project (2021). Note the large area loss between 1957 and 2013. Our bedrock sample locations were completely covered in 1957.

30 **Full Monte Carlo forward model results, erosion rate histograms, and other modeling experiments.**

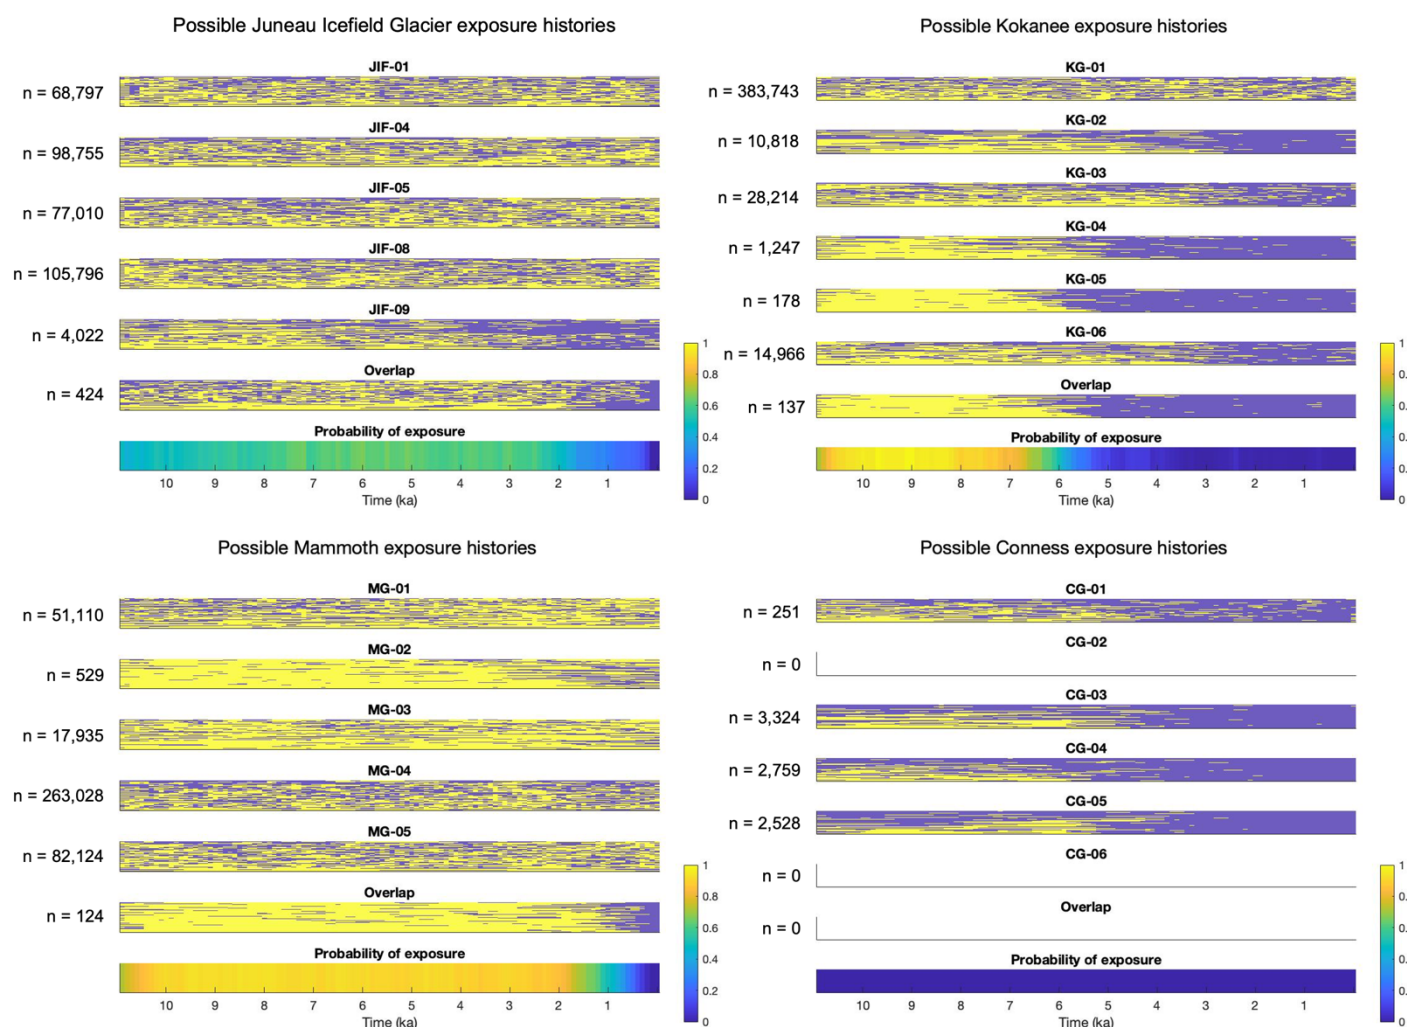

35 **Figure S5.** Full Monte Carlo forward model results of possible exposure-burial histories from each sample at each glacier. The plausible exposure-burial scenarios are plotted as horizontal sequences of yellow and blue timesteps, where yellow represents exposure and blue represents burial (see Figure S5 for illustration). For example, sample KG-04 has 1,247 plausible exposure-burial histories; the scenarios depicted mostly show exposure in the early Holocene and burial in the late Holocene with some variation amongst individual scenarios. An exposure-burial scenario can be successful at multiple erosion rates; thus some n-values are > 100,000. The final ‘Probability of exposure’ is an average of the overlapping scenarios, shown as ‘Overlap.’ Only scenarios with burial in the final two centuries are included in the overlapping scenarios given geologic evidence for burial prior to sampling.”

40

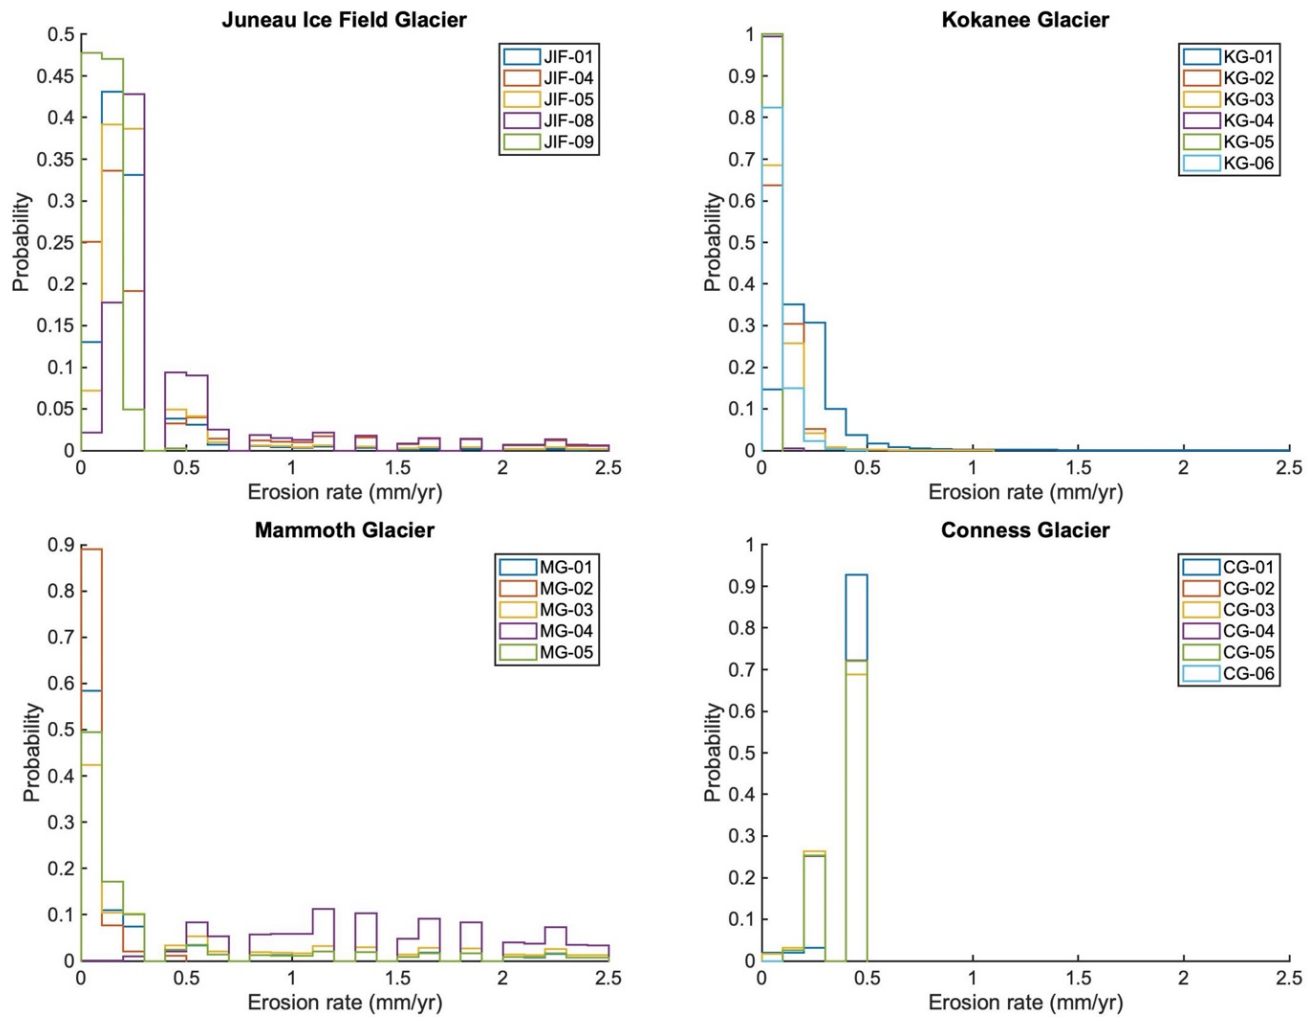

**Figure S6.** Histograms of erosion rates at each sample capable of recreating measured nuclide concentrations from Monte Carlo forward model simulations. The histograms show *all* the erosion rates at each sample that recreated the measured concentrations, regardless of whether the scenario was saved as an overlapping scenario. The Conness Glacier histogram only includes solutions when erosion rates were capped at 0.5 mm yr<sup>-1</sup>. A comparison between tests from 0.0–0.5 mm yr<sup>-1</sup> to tests from 0.0–2.5 mm yr<sup>-1</sup> are shown in Figure S8.

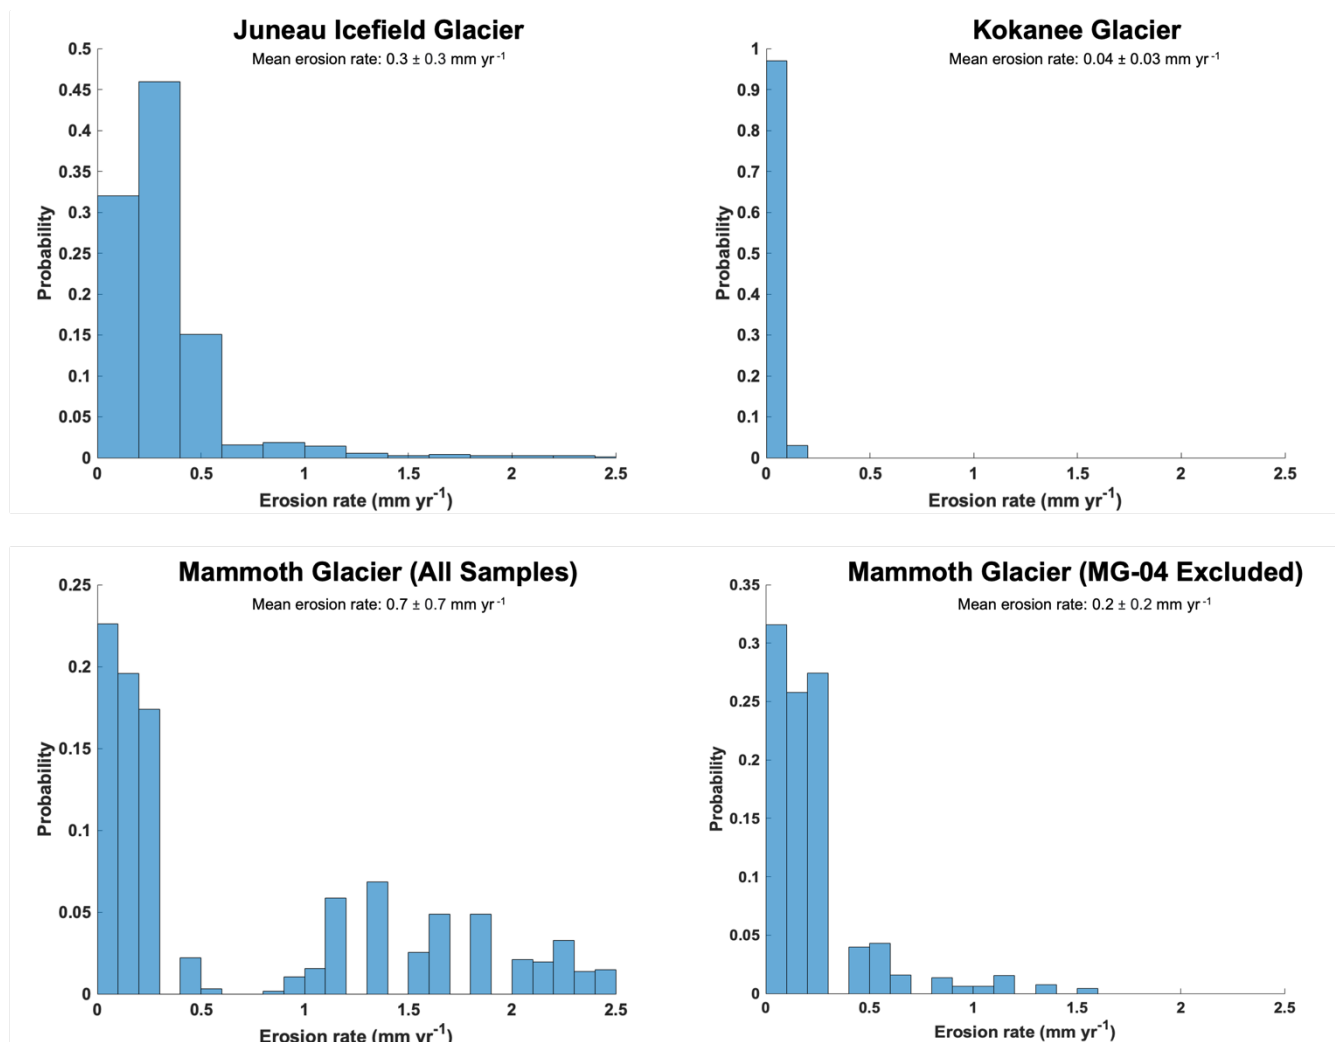

**Figure S7.** Histograms of erosion rates used in overlapping scenarios for all samples at JIF, Kokanee, and Mammoth Glacier. The data in this plot are used to make the mean erosion rate calculations for each glacier. This figure differs from Figure S6 in that Figure S6 shows the erosion rates capable of recreating measured concentrations at each sample regardless of whether the scenario is overlapping. Here, we show only erosion rates used in the overlapping scenarios (successful scenarios for all samples). The two histograms at Mammoth Glacier compare results when including or excluding sample MG-04. This sample has lower nuclide concentrations that suggest deeper erosion than the other samples, perhaps by subglacial quarrying. As a result, the histogram with MG-04 excluded is interpreted to approximate an abrasion rate in the main text.

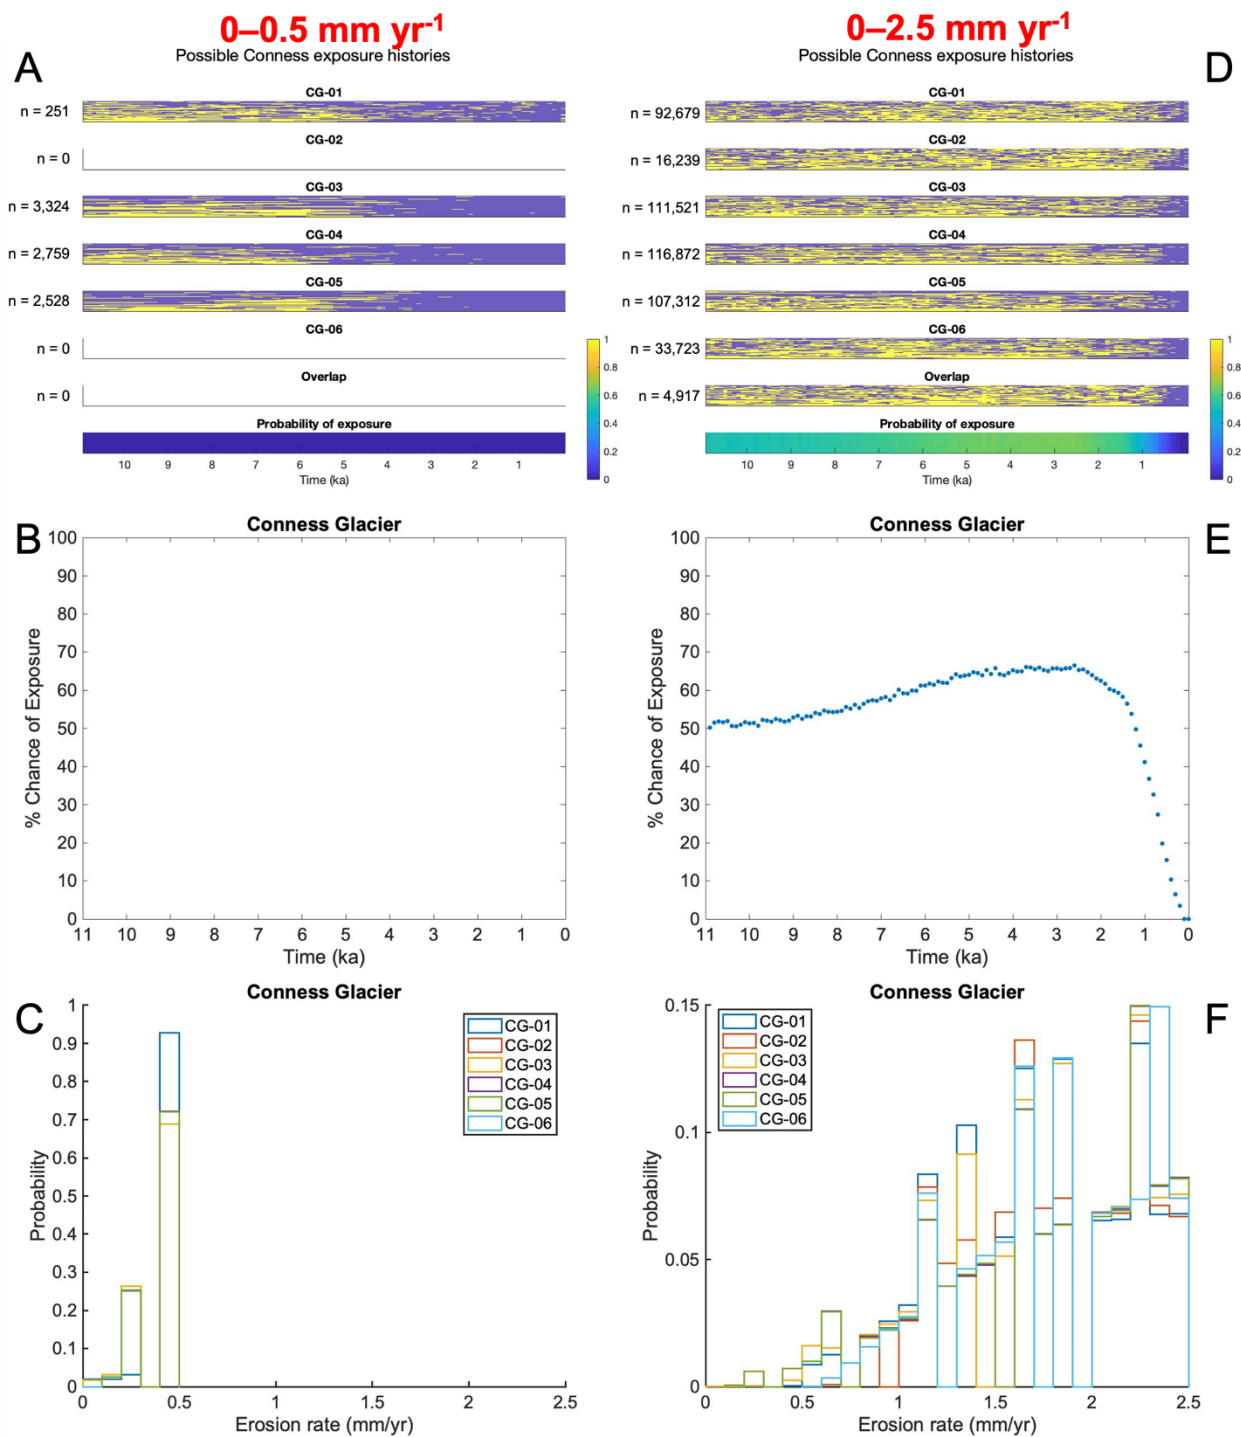

**Figure S8.** Experiment with limiting erosion rates at Conness Glacier in the Monte Carlo forward model. limiting erosion to 0.5 mm yr<sup>-1</sup> (left panels, A–C) versus the full range of erosion rates (0 to 2.5 mm yr<sup>-1</sup>, right panels, D–F). Top panels show all successful exposure-burial histories at each sample and overlapping scenarios. Middle panels show the probability of exposure through time. Bottom panels show histograms of erosion rates used at each sample for the plausible scenarios. See Figures S5 and S6 for further details on the panels. In Panel F, note that the data skews towards higher erosion rates.

## Supplemental Tables

70

**Table S1.  $^{14}\text{C}$  and  $^{10}\text{Be}$  sample data. All uncertainties are  $1\sigma$ .**

| Sample                                 | Latitude<br>(DD) | Longitude<br>(DD) | Elevation<br>(m asl) | Thickness<br>(cm) | Shielding |
|----------------------------------------|------------------|-------------------|----------------------|-------------------|-----------|
| <b><i>Juneau Ice Field Glacier</i></b> |                  |                   |                      |                   |           |
| JIF-01                                 | 59.48509         | -134.91780        | 1160                 | 3.1               | 0.9846    |
| JIF-02                                 | 59.48210         | -134.91800        | 1160                 | 8.2               | 0.9836    |
| JIF-03                                 | 59.48612         | -134.91802        | 1172                 | 2.9               | 0.9813    |
| JIF-04                                 | 59.48354         | -134.91882        | 1132                 | 2.6               | 0.9885    |
| JIF-05                                 | 59.48354         | -134.91882        | 1132                 | 7.2               | 0.9905    |
| JIF-06                                 | 59.48365         | -134.91692        | 1138                 | 3.6               | 0.9801    |
| JIF-07                                 | 59.48388         | -134.91715        | 1140                 | 2.7               | 0.9738    |
| JIF-08                                 | 59.48434         | -134.91700        | 1149                 | 3.3               | 0.9817    |
| JIF-09                                 | 59.48430         | -134.91663        | 1151                 | 5.4               | 0.9830    |
| <b><i>Kokanee Glacier</i></b>          |                  |                   |                      |                   |           |
| KG-01                                  | 49.75904         | -117.16742        | 2462                 | 2.5               | 0.9368    |
| KG-02                                  | 49.75897         | -117.16751        | 2476                 | 3.5               | 0.9368    |
| KG-03                                  | 49.75959         | -117.16631        | 2469                 | 2.0               | 0.9432    |
| KG-04                                  | 49.75830         | -117.16510        | 2538                 | 3.0               | 0.9588    |
| KG-05                                  | 49.75846         | -117.16521        | 2536                 | 2.5               | 0.9545    |
| KG-06                                  | 49.75893         | -117.16585        | 2502                 | 2.0               | 0.9554    |
| <b><i>Mammoth Glacier</i></b>          |                  |                   |                      |                   |           |
| MG-01                                  | 43.17538         | -109.66965        | 3516                 | 2.8               | 0.9794    |
| MG-02                                  | 43.17537         | -109.67020        | 3509                 | 2.5               | 0.9791    |
| MG-03                                  | 43.17583         | -109.67105        | 3496                 | 2.0               | 0.9781    |
| MG-04                                  | 43.17838         | -109.67337        | 3433                 | 2.0               | 0.9785    |
| MG-05                                  | 43.17883         | -109.67379        | 3435                 | 2.5               | 0.9785    |
| <b><i>Conness Glacier</i></b>          |                  |                   |                      |                   |           |
| CG-01                                  | 37.96794         | -119.31320        | 3547                 | 1.5               | 0.9527    |
| CG-02                                  | 37.96840         | -119.31396        | 3536                 | 2.5               | 0.9624    |
| CG-03                                  | 37.96825         | -119.31511        | 3555                 | 1.0               | 0.9331    |
| CG-04                                  | 37.96868         | -119.31751        | 3536                 | 2.0               | 0.9154    |
| CG-05                                  | 37.96878         | -119.31840        | 3529                 | 3.0               | 0.9317    |
| CG-06                                  | 37.96866         | -119.31855        | 3537                 | 2.0               | 0.9206    |

**Table S2.  $^{10}\text{Be}$  laboratory measurement details. All uncertainties are  $1\sigma$ .**

| Sample                                 | Quartz Mass<br>(g) | Be Added<br>(g) | $^{10}\text{Be}/^9\text{Be}^a$<br>( $10^{-13}$ ) | Uncertainty<br>( $10^{-15}$ ) | $^{10}\text{Be}$ Blank |
|----------------------------------------|--------------------|-----------------|--------------------------------------------------|-------------------------------|------------------------|
| <b><i>Juneau Ice Field Glacier</i></b> |                    |                 |                                                  |                               |                        |
| JIF-001                                | 30.1262            | 0.2534          | 0.719                                            | 4.980                         | BLK_092320             |
| JIF-002                                | 6.5279             | 0.2524          | 0.142                                            | 2.100                         | BLK_092320             |
| JIF-003                                | 12.4480            | 0.2515          | 0.038                                            | 0.990                         | BLK_092320             |
| JIF-004                                | 30.1750            | 0.2512          | 0.883                                            | 4.420                         | BLK_092320             |
| JIF-005                                | 30.2996            | 0.2505          | 0.682                                            | 3.970                         | BLK_092320             |
| JIF-006                                | 30.6159            | 0.2499          | 0.070                                            | 1.250                         | BLK_092320             |
| JIF-007                                | 30.2047            | 0.2481          | 0.216                                            | 2.210                         | BLK_092320             |
| JIF-008                                | 30.2035            | 0.2500          | 0.545                                            | 4.370                         | BLK_092320             |
| JIF-009                                | 30.4616            | 0.2501          | 0.746                                            | 4.510                         | BLK_092320             |
| <b><i>Kokanee Glacier</i></b>          |                    |                 |                                                  |                               |                        |
| KG-01                                  | 20.0064            | 0.1946          | 1.260                                            | 4.410                         | 29_1, 29_2             |
| KG-02                                  | 20.0836            | 0.1952          | 1.160                                            | 4.210                         | 29_1, 29_2             |
| KG-03                                  | 17.2460            | 0.1949          | 1.410                                            | 4.550                         | 29_1, 29_2             |
| KG-04                                  | 20.0766            | 0.1949          | 2.120                                            | 5.760                         | 29_1, 29_2             |
| KG-05                                  | 20.0070            | 0.1945          | 2.660                                            | 6.690                         | 29_1, 29_2             |
| KG-06                                  | 20.0311            | 0.1944          | 1.900                                            | 5.100                         | 29_1, 29_2             |
| <b><i>Mammoth Glacier</i></b>          |                    |                 |                                                  |                               |                        |
| MG-01                                  | 34.8843            | 0.1918          | 9.120                                            | 26.300                        | 31_1, 31_2             |
| MG-02                                  | 38.0706            | 0.1928          | 14.900                                           | 42.300                        | 31_1, 31_2             |
| MG-03                                  | 34.6902            | 0.1930          | 11.400                                           | 26.300                        | 31_1, 31_2             |
| MG-04                                  | 24.4404            | 0.1924          | 0.620                                            | 4.290                         | 31_1, 31_2             |
| MG-05                                  | 34.7489            | 0.1923          | 6.830                                            | 17.600                        | 31_1, 31_2             |
| <b><i>Conness Glacier</i></b>          |                    |                 |                                                  |                               |                        |
| CG-01                                  | 20.0062            | 0.1944          | 0.109                                            | 1.130                         | 29_1, 29_2             |
| CG-02                                  | 20.0034            | 0.1937          | 0.093                                            | 1.080                         | 29_1, 29_2             |
| CG-03                                  | 14.6740            | 0.1950          | 0.055                                            | 0.765                         | 29_1, 29_2             |
| CG-04                                  | 20.0049            | 0.1945          | 0.036                                            | 0.748                         | 29_1, 29_2             |
| CG-05                                  | 20.0256            | 0.1951          | 0.039                                            | 0.712                         | 29_1, 29_2             |
| CG-06                                  | 20.0180            | 0.1936          | 0.043                                            | 0.674                         | 29_1, 29_2             |

<sup>a</sup>Measured relative to standard 07KNSTD with an assumed  $^{10}\text{Be}/^9\text{Be}$  ratio of  $2.85 \times 10^{-12}$  (Nishiizumi et al., 2007).

**Table S3.  $^{10}\text{Be}$  Blank Data. All uncertainties are  $1\sigma$ .**

| Blank ID                | Be<br>Added<br>(g) | $^{10}\text{Be}/^9\text{Be}^a$ | Uncertainty | $^{10}\text{Be}$<br>( $10^4$<br>atoms) | Uncertainty<br>( $10^4$ atoms) |
|-------------------------|--------------------|--------------------------------|-------------|----------------------------------------|--------------------------------|
| Blank_29_1              | 0.7648             | 9.86E-16                       | 4.00E-16    | 1.270                                  | 0.515                          |
| Blank_29_2              | 0.7698             | 1.29E-15                       | 3.58E-16    | 1.670                                  | 0.463                          |
| Blank_32_1              | 0.7618             | 7.52E-16                       | 7.20E-16    | 0.963                                  | 0.922                          |
| Blank_32_7              | 0.7670             | 1.78E-15                       | 7.25E-16    | 2.290                                  | 0.935                          |
| BLK_092320 <sup>b</sup> | 0.2770             | 1.51E-15                       | 6.10E-16    | 2.530                                  | 1.170                          |

<sup>a</sup>Measured relative to standard 07KNSTD with an assumed  $^{10}\text{Be}/^9\text{Be}$  ratio of  $2.85 \times 10^{-12}$  (Nishiizumi et al., 2007).

<sup>b</sup>Carrier used is TUBe (904 ppm  $^9\text{Be}$ ). All other blanks used OSUWhite (251.6 ppm  $^9\text{Be}$ )

**Table S4.  $^{14}\text{C}$  laboratory measurement details. All uncertainties are  $1\sigma$ .**

| Sample                                 | Quartz<br>Mass (g) | C<br>Yield<br>( $\mu\text{g}$ ) | Diluted<br>C<br>( $\mu\text{g}$ ) | $^{14}\text{C}/\text{C}$ | Uncert.  | $^{14}\text{C}$<br>( $10^4$<br>atoms/g) | Uncert.<br>( $10^4$<br>atoms) | Effective<br>Blank<br>( $10^4$<br>atoms) | Uncert.<br>( $10^4$<br>atoms) |
|----------------------------------------|--------------------|---------------------------------|-----------------------------------|--------------------------|----------|-----------------------------------------|-------------------------------|------------------------------------------|-------------------------------|
| <b><i>Juneau Ice Field Glacier</i></b> |                    |                                 |                                   |                          |          |                                         |                               |                                          |                               |
| JIF-01                                 | 5.0218             | 26.9                            | 113.2                             | 7.52E-14                 | 4.64E-16 | 7.53                                    | 0.142                         | 4.77                                     | 0.374                         |
| JIF-02                                 | 3.5704             | 46.6                            | 115.3                             | 9.45E-14                 | 7.79E-16 | 13.90                                   | 0.254                         | 4.77                                     | 0.374                         |
| JIF-03                                 | 3.6063             | 120.3                           | 120.3                             | 4.52E-14                 | 4.54E-16 | 6.16                                    | 0.160                         | 4.77                                     | 0.374                         |
| JIF-04                                 | 5.0276             | 19.3                            | 111.2                             | 1.01E-13                 | 7.80E-16 | 10.20                                   | 0.183                         | 4.77                                     | 0.374                         |
| JIF-05                                 | 4.9143             | 14.0                            | 113.3                             | 7.21E-14                 | 4.95E-16 | 7.35                                    | 0.143                         | 4.77                                     | 0.374                         |
| JIF-06                                 | 4.9524             | 11.1                            | 113.6                             | 3.05E-14                 | 4.42E-16 | 2.53                                    | 0.102                         | 4.77                                     | 0.374                         |
| JIF-07                                 | 4.9232             | 17.5                            | 113.5                             | 4.08E-14                 | 3.82E-16 | 3.74                                    | 0.107                         | 4.77                                     | 0.374                         |
| JIF-08                                 | 4.9016             | 21.7                            | 114.7                             | 6.09E-14                 | 4.97E-16 | 6.15                                    | 0.132                         | 4.77                                     | 0.374                         |
| JIF-09                                 | 4.9644             | 7.9                             | 113.7                             | 5.77E-14                 | 5.23E-16 | 5.66                                    | 0.128                         | 4.77                                     | 0.374                         |
| <b><i>Kokanee Glacier</i></b>          |                    |                                 |                                   |                          |          |                                         |                               |                                          |                               |
| KG-01                                  | 4.7200             | 7.0                             | 111.4                             | 1.01E-13                 | 6.22E-16 | 10.90                                   | 0.187                         | 4.77                                     | 0.374                         |
| KG-02                                  | 5.0853             | 4.8                             | 97.5                              | 8.19E-14                 | 5.14E-16 | 6.89                                    | 0.134                         | 4.77                                     | 0.374                         |
| KG-03                                  | 2.8927             | 3.7                             | 94.2                              | 7.28E-14                 | 5.39E-16 | 10.20                                   | 0.218                         | 4.77                                     | 0.374                         |
| KG-04                                  | 5.0205             | 4.1                             | 113.2                             | 1.00E-13                 | 6.52E-16 | 10.30                                   | 0.178                         | 4.77                                     | 0.374                         |
| KG-05                                  | 4.0061             | 3.0                             | 111.1                             | 9.33E-14                 | 5.38E-16 | 11.70                                   | 0.204                         | 4.77                                     | 0.374                         |
| KG-06                                  | 4.1491             | 4.3                             | 112.7                             | 9.35E-14                 | 5.46E-16 | 11.50                                   | 0.200                         | 4.77                                     | 0.374                         |
| <b><i>Mammoth Glacier</i></b>          |                    |                                 |                                   |                          |          |                                         |                               |                                          |                               |
| MG-01                                  | 4.9461             | 41.0                            | 114.9                             | 5.00E-13                 | 1.76E-15 | 56.80                                   | 0.771                         | 4.77                                     | 0.374                         |
| MG-02                                  | 5.0272             | 37.3                            | 113.5                             | 5.37E-13                 | 1.93E-15 | 59.70                                   | 0.810                         | 4.77                                     | 0.374                         |
| MG-03                                  | 5.0664             | 28.0                            | 111.6                             | 6.01E-13                 | 2.10E-15 | 65.30                                   | 0.883                         | 4.77                                     | 0.374                         |
| MG-04                                  | 4.9380             | 32.3                            | 112.3                             | 8.40E-14                 | 8.96E-16 | 8.68                                    | 0.178                         | 4.77                                     | 0.374                         |
| MG-05                                  | 5.1169             | 38.9                            | 112.7                             | 4.40E-13                 | 1.60E-15 | 47.60                                   | 0.650                         | 4.77                                     | 0.374                         |
| <b><i>Conness Glacier</i></b>          |                    |                                 |                                   |                          |          |                                         |                               |                                          |                               |
| CG-01                                  | 4.9625             | 4.9                             | 113.6                             | 2.60E-14                 | 3.12E-16 | 2.65                                    | 0.109                         | 1.57                                     | 0.474                         |
| CG-02                                  | 3.9543             | 3.5                             | 112.7                             | 2.32E-14                 | 5.39E-16 | 2.91                                    | 0.149                         | 1.57                                     | 0.474                         |
| CG-03                                  | 3.6099             | 2.8                             | 103.5                             | 2.24E-14                 | 3.73E-16 | 1.59                                    | 1.010                         | 5.85                                     | 3.640                         |
| CG-04                                  | 5.1309             | 3.1                             | 100.4                             | 1.55E-14                 | 2.41E-16 | 0.37                                    | 0.709                         | 5.85                                     | 3.640                         |
| CG-05                                  | 5.0159             | 3.3                             | 101.6                             | 2.27E-14                 | 2.89E-16 | 1.13                                    | 0.726                         | 5.85                                     | 3.640                         |
| CG-06                                  | 3.9691             | 3.6                             | 112.9                             | 2.07E-14                 | 3.91E-16 | 2.55                                    | 0.137                         | 1.57                                     | 0.474                         |

**Table S5. Glacier area calculations and details.**

| Glacier                        | Year | Area <sup>a</sup><br>(km <sup>2</sup> ) | Change from LIA<br>Area (%) | Citation                    | Image Source        |
|--------------------------------|------|-----------------------------------------|-----------------------------|-----------------------------|---------------------|
| <b>JIF Glacier</b>             | 2021 | 14.05                                   | 76.9                        | This study                  | Copernicus          |
|                                | 2003 | 14.77                                   | 80.9                        | This study                  | Copernicus          |
|                                | 1880 | 18.26                                   | 100.0                       | This study                  | Copernicus          |
| <b>Kokanee Glacier</b>         | 2021 | 2.63                                    | 39.1                        | This study                  | Copernicus          |
|                                | 2008 | 2.77                                    | 41.2                        | This study                  | Copernicus          |
|                                | 1880 | 6.73                                    | 100.0                       | This study                  | Copernicus          |
| <b>Mammoth Glacier</b>         | 2014 | 1.67                                    | 49.0                        | DeVisser and Fountain, 2015 | Maps, aerial photos |
|                                | 2006 | 2.00                                    | 58.7                        | DeVisser and Fountain, 2015 | Maps, aerial photos |
|                                | 2001 | 2.06                                    | 60.4                        | DeVisser and Fountain, 2015 | Maps, aerial photos |
|                                | 1994 | 2.29                                    | 67.2                        | DeVisser and Fountain, 2015 | Maps, aerial photos |
|                                | 1966 | 2.54                                    | 74.5                        | DeVisser and Fountain, 2015 | Maps, aerial photos |
|                                | 1950 | 2.88                                    | 84.5                        | DeVisser and Fountain, 2015 | Maps, aerial photos |
|                                | 1880 | 3.41                                    | 100.0                       | DeVisser and Fountain, 2015 | Maps, aerial photos |
| <b>Conness Glacier</b>         | 2021 | 0.11                                    | 16.8                        | This study                  | Copernicus          |
|                                | 2004 | 0.16                                    | 24.6                        | Basgaic and Fountain, 2011  | Basagic Survey      |
|                                | 1972 | 0.1977                                  | 30.4                        | Basgaic and Fountain, 2011  | Historical Photo    |
|                                | 1954 | 0.2304                                  | 35.4                        | Basgaic and Fountain, 2011  | Historical Photo    |
|                                | 1944 | 0.2611                                  | 40.2                        | Basgaic and Fountain, 2011  | Historical Photo    |
|                                | 1880 | 0.65                                    | 100.0                       | This Study                  | Copernicus          |
| <b>Wind River Composite</b>    | 2006 | 20.40                                   | 55.6                        | DeVisser and Fountain, 2015 | NA                  |
|                                | 2001 | 21.29                                   | 58.1                        | DeVisser and Fountain, 2015 | NA                  |
|                                | 1994 | 23.37                                   | 63.7                        | DeVisser and Fountain, 2015 | NA                  |
|                                | 1966 | 27.32                                   | 74.5                        | DeVisser and Fountain, 2015 | NA                  |
|                                | 1880 | 36.67                                   | 100.0                       | DeVisser and Fountain, 2015 | NA                  |
| <b>Sierra Nevada Synthetic</b> | 2004 | 31.32                                   | 44.0                        | Basgaic and Fountain, 2011  | NA                  |
|                                | 1972 | 39.15                                   | 55.0                        | Basgaic and Fountain, 2011  | NA                  |
|                                | 1880 | 71.18                                   | 100.0                       | Basgaic and Fountain, 2011  | NA                  |
