# Supplementary material for: Four North American glaciers advanced past their modern positions thousands of years apart in the Holocene
Source: Copernicus journal article supplement (doi:10.5194/tc-17-5459-2023), 2023-12-21
Supplement: Supplementary file 3 [file tc-17-5459-2023-supplement.zip]

Archive with 7 entries (7 files):
- tc-17-5459-2023-supplement-title-page.pdf
- Table S4 14C laboratory measurement details.xlsx
- Jones_Supplement_Revised_Round2.pdf
- Table S5. Glacier area calculations and details..xlsx
- Table S3 10Be blank data.xlsx
- Table S1 14C and 10Be sample data.xlsx
- Table S2 10Be Laboratory Measurement details.xlsx
